# Supplementary material for: Application of a thermo-sensitive imprinted SERS substrate to the rapid trace detection of ofloxacin
Source: Royal Society of Chemistry journal article supplement (doi:10.1039/d0ay00616e), 2020-01-01
Supplement: d0ay00616e1.pdf [file d0ay00616e1.pdf]

## **Electronic Supplementary Information (ESI)**

### **Application of thermo-sensitive imprinted SERS substrate on the rapid trace detection of ofloxacin**

Caiyun Jiang,<sup>a, b, 1</sup> Ting Wu,<sup>a, 1</sup> Jiaxun Liu<sup>a</sup> and Yuping Wang<sup>\*a</sup>

<sup>a</sup> College of Chemistry and Materials Science, Nanjing Normal University, Nanjing 210023, China. Email: wangyuping@njnu.edu.cn

<sup>b</sup> Jiangsu Engineering and Research Center of Food Safety, Department of Engineering and Technology, Jiangsu Vocational Institute of Commerce, Nanjing 210007, China.

a

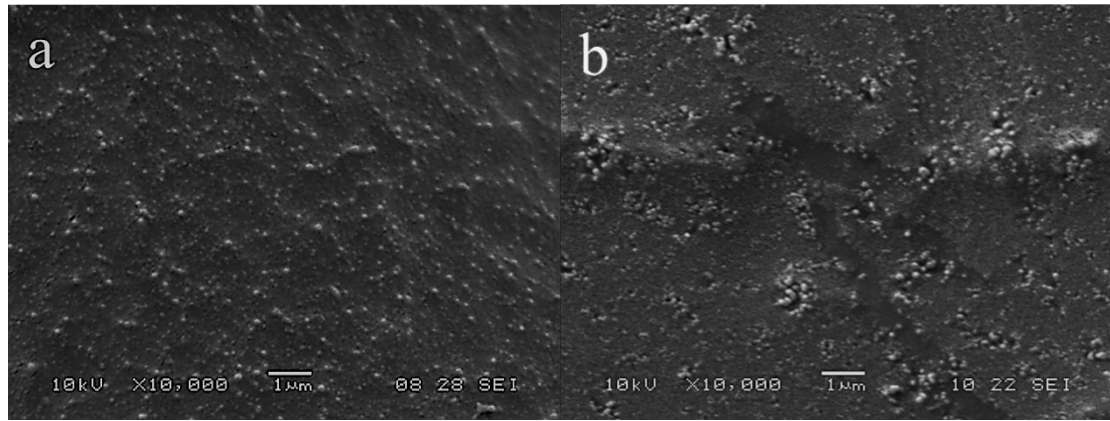

**Figure S1** SEM images of AgNPs-MIPs after drying at -54 °C (a) and 50 °C (b).
